# Supplementary material for: Lifespan extension conferred by mitogen-activated protein kinase kinase kinase 5 (MAP3K5) longevity-associated gene variation is confined to at-risk men with a cardiometabolic disease
Source: Aging (Albany NY). 2021 Mar 19;13(6):7953–74. doi: 10.18632/aging.202844 (PMC8034933; doi:10.18632/aging.202844)
Supplement: Supplementary Figures [file aging-13-202844-s002.pdf]

[www.aging-us.com](http://www.aging-us.com)

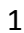

## AGING

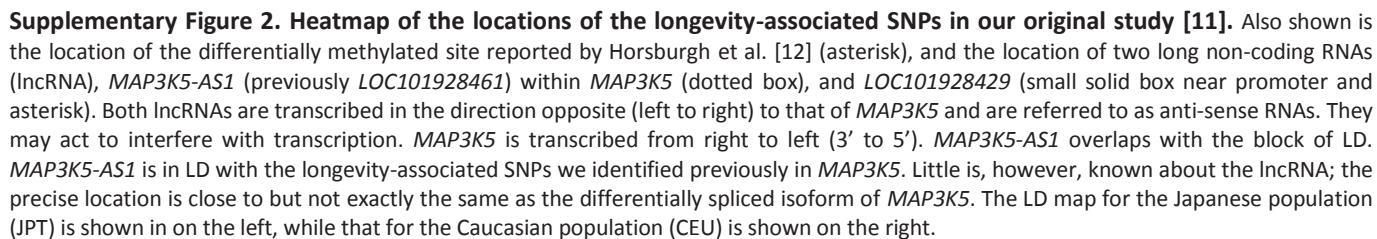

**rs2237269**

GTF2I

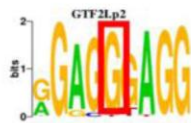

logo: DGRBKKAGG  
maj: GTGAGGTAGGCC  
min: GTGAGCTAGGCC

**rs6906753**

ATF3

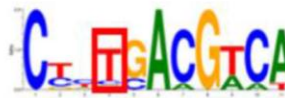

logo: BVTGAMKTCA  
maj: CCCGACGTTA  
min: CCTGACGTTA

**rs2076260**

DMRT1

No logo available

logo: RMWACAWTGTWDCMR  
maj: TTAAATTGTCTCTAC  
min: TCAAATTGTCTCTAC

HEY1

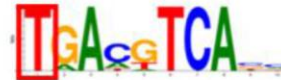

logo: BVTGAMKTCA  
maj: CCCGACGTTA  
min: CCTGACGTTA

HOXD10

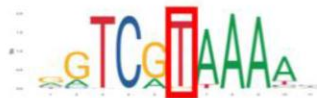

logo: VDBNYMATWAAA  
maj: TATATTAAATTGT  
min: TATATCAAATTGT

**rs1011969**

MEF2

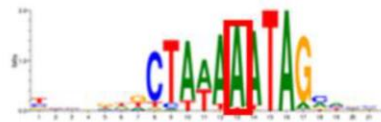

logo: YTWAAWATARCH  
maj: CTTTAAACAGCCA  
min: CTTTAAAAAGCCA

Pou2f2

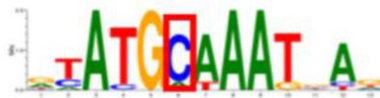

logo: VTWTKMAWAWHBNB  
maj: TATATTAAATTGT  
min: TATATCAAATTGT

TATA

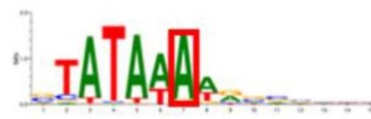

logo: NSYWTAAAAAR  
maj: CTTTAAACAGCCA  
min: CTTTAAAAAGCCA

TATA

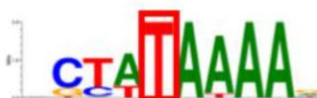

logo: WVAWWHDN  
maj: TATATTAAATTGT  
min: TATATCAAATTGT

**Rs2272887**

MTF1

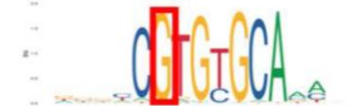

logo: SGGCCGDGYGCAVM  
maj: GGTCAATGTGCAGG  
min: GGTCAAGTGTGCAGG

**Supplementary Figure 3. Transcription factor binding sites modified by SNP *rs2076260*.** *rs2076260* and its immediate neighboring SNP, *rs6904753*, are in perfect LD. SNP *rs2076260* is predicted to modify the binding of three transcription factors, HOXD10, Pou2f2, and TATA. The major allele is predicted to create/increase binding of HOXD10, abolish/reduce binding of Pou2f2, and create/increase binding of TATA. For *rs6906753* the major allele would reduce/abolish binding of ATF3 and HEY1 transcription factors. Red rectangles denote the variant SNP nucleotide in the transcription factor canonical sequence. (Abbreviations: maj, major allele; min, minor allele; logo is the canonical recognition site for each. Nucleotide ambiguity codes are: B, not A; V, not T; M, C or A; K, T or G; W, A or T).

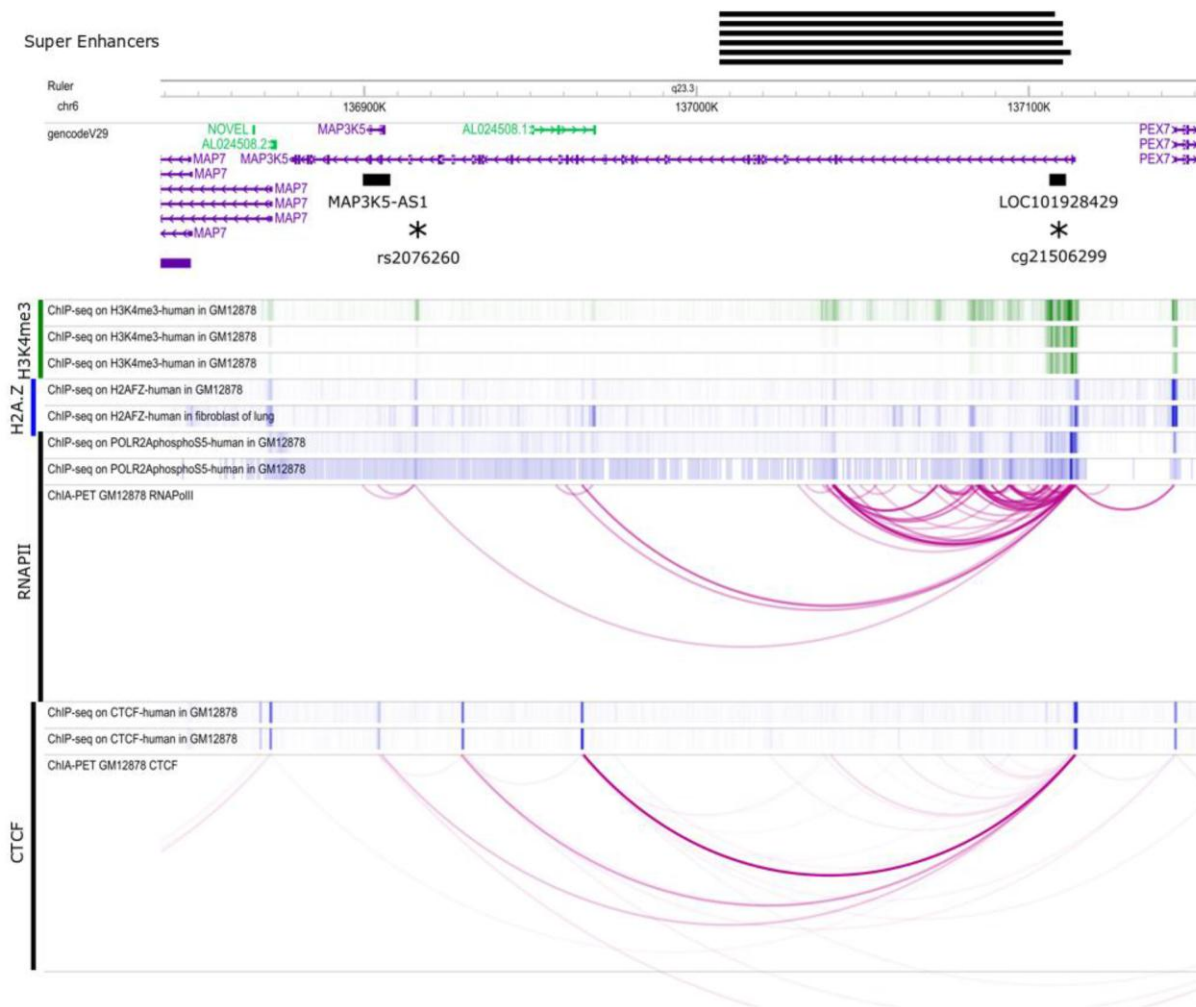

**Supplementary Figure 4. Possible functional relationships between *rs2076260* and regulatory features in *MAP3K5*.** We postulate that *rs2076260* interacts with other *cis*-regulatory elements. Shown by asterisks are the locations of the most significant SNP (*rs2076260*) in *MAP3K5* relative to two long non-coding RNAs, *MAP3K5-AS1* and *LOC101928429*, and the differentially methylated site associated with BMI, cg21506299. The anti-sense lncRNAs as well as SNP *rs2076260* and the promoter proper overlap with peaks of H3K4me4 (green) (see review by Morris et al. [13]), which is commonly associated with sites of activation of transcription of nearby genes, the histone variant H2A.Z (blue), which is associated with regions of genome fluidity (see review Morris et al. [13]). GM12878 (lymphocyte) experiments were chosen for reference. These locations are connected via RNA polymerase II (RNAPII) and CTCF chromatin looping, indicating that they are likely co-regulated during transcription. *MAP3K5* is transcribed from right to left (purple herring bone). GM12878 (lymphocyte) experiments were chosen for reference. The locations of super-enhancers are shown by solid bars at top.
