# Supplementary material for: Lifespan extension conferred by mitogen-activated protein kinase kinase kinase 5 (MAP3K5) longevity-associated gene variation is confined to at-risk men with a cardiometabolic disease
Source: publisher site journal article supplement (doi:10.18632/aging.202844), 2021-03-19
Supplement: Supplementary file [file aging-v13i6-202844-supplementary-material-SD3.pdf]

## SUPPLEMENTARY TABLES

**Supplementary Table 1. Characteristics of cases (n=440) and controls (n=374), age-adjusted (except age and year of birth) used in our prior case-control studies.**

| Late life examination characteristics       | Controls      | Cases        | <i>p</i>  |
|---------------------------------------------|---------------|--------------|-----------|
| Age at examination, y                       | 74.7 ± 2.1    | 81.5 ± 4.7   | 2.1E-107* |
| Birth year                                  | 1916.8 ± 2.0  | 1909.9 ± 4.7 | 1.9E-111* |
| Anthropometric and physiological            |               |              |           |
| Height, cm                                  | 161.2 ± 5.6   | 161.3 ± 5.5  | 0.96      |
| Weight, kg                                  | 59.6 ± 9.6    | 61.6 ± 8.0   | 0.020     |
| Waist to hip ratio                          | 0.95 ± 0.06   | 0.94 ± 0.05  | 0.015     |
| BMI, kg/m <sup>2</sup>                      | 23.0 ± 3.1    | 23.6 ± 2.9   | 0.040     |
| Triceps skinfold thickness, mm              | 10.5 ± 4.1    | 10.2 ± 4.1   | 0.40      |
| Subscapular skinfold thickness, mm          | 15.5 ± 6.7    | 16.5 ± 5.5   | 0.09      |
| Best forced expiratory volume in 1 s, L     | 1.9 ± 0.49    | 2.1 ± 0.41   | 1.5E-06*  |
| Grip strength, kg                           | 26.9 ± 7.1    | 31.7 ± 5.2   | 1.2E-15*  |
| Blood pressure, systolic, mmHg              | 151.0 ± 26.3  | 150.4 ± 22.4 | 0.079     |
| Blood pressure, diastolic, mmHg             | 79.0 ± 12.7   | 81.6 ± 11.6  | 0.022     |
| Ankle-brachial index                        | 1.0 ± 0.20    | 1.1 ± 0.14   | 2.1E-14*  |
| Cognitive (CASI) score                      | 75.6 ± 19.8   | 87.1 ± 10.6  | 2.2E-5*   |
| Hematological and biochemical               |               |              |           |
| Total cholesterol, mg/dL                    | 183 ± 34.2    | 195 ± 32.6   | 0.00034*  |
| HDL cholesterol, mg/dL                      | 51.3 ± 14.4   | 51.3 ± 13.1  | 0.97      |
| Triglycerides, mg/dL                        | 146.5 ± 119.3 | 152.3 ± 78.7 | 0.54      |
| Fasting plasma glucose, mg/dL               | 118.5 ± 36.8  | 108.6 ± 21.5 | 0.00054*  |
| Fasting plasma insulin, mIU/dL              | 26.2 ± 84.3   | 13.1 ± 9.5   | 0.018     |
| Plasma fibrinogen, mg/dL                    | 331 ± 75.8    | 291 ± 52.7   | 1.5E-10*  |
| White blood cell count, 10 <sup>3</sup> /μL | 6.98 ± 2.09   | 5.87 ± 1.50  | 1.3E-10*  |
| Health habits                               |               |              |           |
| Current smoker, %                           | 13.6          | 4.0          | 0.00035*  |
| Past smoker, %                              | 60.0          | 48.3         | 0.016     |
| Smoking, pack-years                         | 37.2 ± 35.8   | 17.4 ± 30.5  | 2.9E-9*   |
| Alcohol consumption, ounces/month           | 29.4 ± 53.6   | 14.4 ± 29.2  | 0.00033*  |
| Physical activity index, metabolic work/day | 29.9 ± 4.6    | 31.7 ± 4.4   | 3.5E-5*   |
| Difficulty in walking 0.8 km, %             | 39.8          | 6.6          | 1.0E-17*  |
| On diabetes medication, %                   | 18.1          | 6.9          | 0.00026*  |
| Diseases                                    |               |              |           |
| Hypertension, %                             | 74.1          | 78.8         | 0.24      |
| Coronary heart disease, %                   | 26.7          | 14.2         | 0.00085   |
| Stroke history, %                           | 9.3           | 1.2          | 7.6E-5*   |
| Cancer, %                                   | 23.8          | 10.0         | 8.3E-5*   |
| Diabetes, %                                 | 35.0          | 21.7         | 0.00011*  |
| Emphysema, %                                | 4.8           | 1.4          | 0.038     |
| Bypass history, %                           | 11.9          | 3.5          | 0.05      |
| Angioplasty, %                              | 4.1           | 1.4          | 0.37      |
| Surgery on arteries of the neck, %          | 1.4           | 0.69         | 0.41      |
| Aorta surgery, %                            | 8.4           | 0.92         | 8.7E-7*   |
| Ankle-brachial index < 0.9, %               | 24.8          | 3.7          | 6.9E-11*  |
| Sociodemographic                            |               |              |           |
| Education, years                            | 10.2 ± 2.8    | 10.5 ± 3.5   | 0.30      |
| Married, %                                  | 75.5          | 86.9         | 0.002     |

The data shown are age-adjusted. \*Indicates that difference remained significant after the *p* value shown was adjusted by the Bonferroni method for the 41 parameters tested.

**Supplementary Table 2. The SNPs genotyped in *MAP3K5* and the minor allele frequency of each in control American men of Japanese ancestry in the Kuakini Honolulu Heart Program, and of Japanese subjects in the dbSNP database.**

| <b>SNP</b>        | <b>KHHP</b> | <b>dSNP</b> |
|-------------------|-------------|-------------|
| <i>rs1570055</i>  | 0.479       | 0.488       |
| <i>rs1570054</i>  | 0.445       | 0.465       |
| <i>rs12529435</i> | 0.181       | 0.133       |
| <i>rs2327742</i>  | 0.546       | 0.488       |
| <i>rs9376222</i>  | 0.103       | 0.111       |
| <i>rs7775356</i>  | 0.297       | 0.278       |
| <i>rs6905203</i>  | 0.433       | 0.442       |
| <i>rs877192</i>   | 0.256       | 0.193       |
| <i>rs6910459</i>  | 0.238       | 0.221       |
| <i>rs1997703</i>  | 0.418       | 0.407       |
| <i>rs2076260*</i> | 0.455       | 0.458       |
| <i>rs12164028</i> | 0.345       | 0.343       |
| <i>rs17723504</i> | 0.696       | 0.200       |
| <i>rs9376207</i>  | 0.233       | 0.144       |
| <i>rs6904753*</i> | 0.467       | 0.477       |
| <i>rs9385770</i>  | 0.479       | 0.447       |
| <i>rs17796708</i> | 0.252       | 0.244       |
| <i>rs4631311</i>  | 0.383       | 0.378       |
| <i>rs6916746</i>  | 0.118       | 0.110       |
| <i>rs2272887</i>  | 0.483       | 0.477       |
| <i>rs9494547</i>  | 0.171       | 0.169       |
| <i>rs13203080</i> | 0.241       | 0.221       |
| <i>rs2237264</i>  | 0.172       | 0.148       |
| <i>rs9376211</i>  | 0.173       | 0.278       |
| <i>rs13195420</i> | 0.189       | 0.140       |
| <i>rs3765259</i>  | 0.441       | 0.401       |
| <i>rs9402838</i>  | 0.270       | 0.364       |
| <i>rs9376219</i>  | 0.183       | 0.134       |
| <i>rs9494552</i>  | 0.284       | 0.273       |
| <i>rs9321564</i>  | 0.480       | 0.424       |
| <i>rs4363056</i>  | 0.409       | 0.471       |
| <i>rs17723638</i> | 0.189       | 0.156       |
| <i>rs9376221</i>  | 0.103       | 0.099       |

\*Denotes those SNPs in a cluster associated with longevity using a dominant model. A cluster was defined as SNPs in close physical proximity and/or belonging to the same block of linkage disequilibrium (LD).

**Supplementary Table 3. The two *MAP3K5* SNPs in the case-control study that were associated with longevity after Bonferroni correction and results for the four genetic models used.**

| SNP              | Estimate | S.E.  | OR    | <i>p</i> | Model*       | C_H  | <i>p</i> | R_H  | <i>p</i> |
|------------------|----------|-------|-------|----------|--------------|------|----------|------|----------|
| <i>rs2076260</i> | -0.079   | 0.098 | 0.92  | 0.42     | Additive     | -    | -        | -    | -        |
| <i>rs2076260</i> | -0.637   | 0.151 | 0.53  | <.0001   | Het vs other | 1.95 | 0.0001   | 1.81 | 0.0018   |
| <i>rs2076260</i> | 0.4527   | 0.159 | 1.57  | 0.0043   | MM vs other  | -    | -        | -    | -        |
| <i>rs2076260</i> | 0.2987   | 0.174 | 1.35  | 0.086    | RR vs other  | -    | -        | -    | -        |
| <i>rs6904753</i> | -0.066   | 0.098 | 0.936 | 0.50     | Additive     | -    | -        | -    | -        |
| <i>rs6904753</i> | -0.417   | 0.141 | 0.659 | 0.0032   | Het vs other | 1.57 | 0.0066   | 1.45 | 0.040    |
| <i>rs6904753</i> | 0.336    | 0.157 | 1.40  | 0.032    | MM vs other  | -    | -        | -    | -        |
| <i>rs6904753</i> | 0.202    | 0.170 | 1.22  | 0.23     | RR vs other  | -    | -        | -    | -        |

OR was estimated using a logistic model with long-lived case as the outcome. If OR was significantly > 1, then the genotype comparison indicated a pro-longevity effect.

\*Model:

Additive model: gene effect is coded as common homozygote (CC) = 0, heterozygote (CT) =1, minor allele homozygote (TT) = 2 in a linear logistic model.

Het = heterozygote (CT).

MM = common homozygote (CC), and RR = minor allele homozygote (TT).

C\_H: OR of common homozygote (CC) vs. heterozygote (CT) with long-lived case.

R\_H: OR of minor allele homozygote (TT) vs. heterozygote (CT) with long-lived case.

Other: The other genotype(s).

S.E. = standard error of the mean.

**Supplementary Table 4. Characteristics of all subjects at baseline (1991–1993) by *MAP3K5 rs2076260* genotype.**

| <b>Characteristics</b>                      | <b>CC</b>    | <b>CT</b>    | <b>TT</b>    | <b><i>p</i></b> |
|---------------------------------------------|--------------|--------------|--------------|-----------------|
| <b>n</b>                                    | 1000         | 1733         | 783          |                 |
| Age at examination, yr                      | 77.8 ± 4.6   | 77.6 ± 4.6   | 77.8 ± 4.7   | 0.48            |
| Birth year                                  | 13.6 ± 4.6   | 13.8 ± 4.6   | 13.7 ± 4.7   | 0.48            |
| <b>Anthropometric and physiological</b>     |              |              |              |                 |
| Height, cm                                  | 161.9 ± 5.7  | 161.7 ± 5.5  | 161.6 ± 5.9  | 0.66            |
| Weight, kg                                  | 61.7 ± 9.4   | 61.2 ± 8.9   | 61.4 ± 9     | 0.35            |
| Waist to hip ratio                          | 0.9 ± 0.1    | 0.9 ± 0.1    | 0.9 ± 0.1    | 0.98            |
| BMI, kg/m <sup>2</sup>                      | 23.6 ± 3.2   | 23.4 ± 3     | 23.5 ± 3.1   | 0.31            |
| Triceps skinfold thickness, mm              | 10.1 ± 4     | 10.1 ± 3.9   | 10.1 ± 4     | 0.90            |
| Subscapular skinfold thickness, mm          | 16.3 ± 6.1   | 16 ± 5.9     | 16.4 ± 6.5   | 0.36            |
| Best forced expiratory volume               | 2.1 ± 0.5    | 2.1 ± 0.4    | 2.1 ± 0.5    | 0.58            |
| Grip strength, kg                           | 30.4 ± 5.8   | 30.1 ± 6.2   | 30.2 ± 6.2   | 0.55            |
| Blood pressure, systolic, mmHg              | 148.9 ± 23.9 | 149.5 ± 23.5 | 149.5 ± 22.8 | 0.83            |
| Blood pressure, diastolic, mmHg             | 79.9 ± 11.3  | 79.8 ± 11.6  | 80.3 ± 10.7  | 0.60            |
| Cognitive (CASI) score                      | 83.3 ± 13.9  | 82.2 ± 15.3  | 82.9 ± 13.4  | 0.14            |
| <b>Hematological and biochemical</b>        |              |              |              |                 |
| Total cholesterol, mg/dL                    | 191.1 ± 32.2 | 188.9 ± 32.8 | 190.3 ± 33.3 | 0.24            |
| HDL cholesterol, mg/dL                      | 50.7 ± 13.6  | 51.1 ± 13.1  | 51 ± 13.5    | 0.76            |
| Triglycerides, mg/dL                        | 151.2 ± 97.7 | 147.7 ± 91.5 | 149.3 ± 95.2 | 0.63            |
| Fasting plasma glucose, mg/dL               | 113.9 ± 29.7 | 113.2 ± 30.4 | 111.5 ± 27   | 0.24            |
| Fasting plasma insulin, mIU/dL              | 15.9 ± 14.7  | 15.4 ± 13.1  | 15.3 ± 11.7  | 0.56            |
| Plasma fibrinogen, mg/dL                    | 305.8 ± 65.8 | 306.9 ± 63.3 | 308.4 ± 63.3 | 0.71            |
| White blood cell count, 10 <sup>3</sup> /μL | 6.3 ± 2.5    | 6.3 ± 1.7    | 6.3 ± 2.4    | 0.96            |
| <b>Health habits</b>                        |              |              |              |                 |
| Current smoker, %                           | 6.5          | 7            | 7.3          | 0.80            |
| Past smoker, %                              | 55.1         | 56.3         | 53           | 0.33            |
| Smoking, pack-years                         | 26.1 ± 34.4  | 26.9 ± 34.2  | 23.6 ± 33    | 0.10            |
| Alcohol consumption, ounces/month           | 18.7 ± 39.1  | 18.8 ± 39.9  | 18.9 ± 43    | 1.00            |
| Physical activity index, metabolic work/day | 31 ± 4.7     | 30.8 ± 4.5   | 30.9 ± 4.7   | 0.55            |
| Difficulty in walking 0.8 km, %             | 19.4         | 18.1         | 18.3         | 0.65            |
| On diabetes medication, %                   | 11.4         | 11.6         | 10.1         | 0.51            |
| <b>Diseases</b>                             |              |              |              |                 |
| Hypertension (160/95), %                    | 54.2         | 53.2         | 52.9         | 0.83            |
| Coronary heart disease, %                   | 20           | 20.6         | 21.3         | 0.79            |
| Stroke history, %                           | 3.6          | 4.9          | 3.9          | 0.25            |
| Cancer, %                                   | 11.7         | 13.7         | 14.9         | 0.13            |
| Diabetes, %                                 | 28.9         | 28.3         | 28.6         | 0.94            |
| Emphysema, %                                | 2.7          | 3.2          | 2.2          | 0.40            |
| Bypass history, %                           | 7.6          | 7.7          | 5.8          | 0.19            |
| Angioplasty, %                              | 6            | 7.3          | 6.6          | 0.40            |
| Surgery on arteries of the neck, %          | 1.3          | 1.1          | 0.9          | 0.74            |
| Aorta surgery, %                            | 3            | 3.7          | 2.8          | 0.40            |
| Ankle-brachial index < 0.9, %               | 12.3         | 12.6         | 12.5         | 0.96            |
| <b>Sociodemographic</b>                     |              |              |              |                 |
| Education, years                            | 10.6 ± 3.1   | 10.5 ± 3.1   | 10.6 ± 3.2   | 0.53            |
| Married, %                                  | 85.5         | 82.9         | 80.7         | 0.029           |

**Supplementary Table 5. Age-adjusted baseline variables by cardiometabolic disease (CMD)\* status and *MAP3K5 rs2076260* genotype.**

| Variable                                     | With CMD*    |              |              |             | Without CMD  |              |             |          |
|----------------------------------------------|--------------|--------------|--------------|-------------|--------------|--------------|-------------|----------|
|                                              | CC           | CT           | TT           | <i>p</i> ** | CC           | CT           | TT          | <i>p</i> |
| <b>n</b>                                     | 701          | 1212         | 548          |             | 299          | 521          | 235         | –        |
| Age (years)                                  | 77.9 ± 4.6   | 77.6 ± 4.5   | 77.9 ± 4.6   | 0.35        | 77.7 ± 4.5   | 77.6 ± 4.7   | 77.5 ± 4.7  | 0.82     |
| BMI (kg/m <sup>2</sup> )                     | 23.8 ± 3.2   | 23.6 ± 3     | 23.7 ± 3.1   | 0.61        | 23 ± 3       | 22.7 ± 3     | 23.1 ± 3.1  | 0.20     |
| Waist to hip ratio                           | 0.95 ± 0.06  | 0.95 ± 0.06  | 0.95 ± 0.06  | 0.60        | 0.94 ± 0.06  | 0.93 ± 0.06  | 0.94 ± 0.05 | 0.34     |
| Fasting plasma glucose (mg/dL)               | 119.2 ± 33.6 | 118.3 ± 34.7 | 116 ± 30.8   | 0.20        | 101.3 ± 8.4  | 101.2 ± 8.7  | 101.5 ± 8.5 | 0.92     |
| Fasting plasma insulin (mIU/dL)              | 20.1 ± 49.6  | 17.9 ± 24.3  | 17.7 ± 29.1  | 0.33        | 12.1 ± 6.8   | 12 ± 7       | 12.5 ± 6.8  | 0.62     |
| Plasma fibrinogen (mg/dL)                    | 309.2 ± 65.7 | 309.3 ± 63.9 | 314.1 ± 66.5 | 0.32        | 297.8 ± 65.4 | 301.5 ± 61.5 | 295.1 ± 53  | 0.38     |
| White blood cell count (10 <sup>3</sup> /μL) | 6.4 ± 2.8    | 6.4 ± 1.7    | 6.4 ± 2.6    | 0.96        | 5.9 ± 1.7    | 6 ± 1.7      | 5.9 ± 1.6   | 0.81     |
| Smoking (pack-years)                         | 27.5 ± 35.6  | 27.3 ± 34.2  | 24.6 ± 34.3  | 0.28        | 22.8 ± 31.1  | 26.0 ± 34.1  | 21.5 ± 29.8 | 0.18     |
| Alcohol intake (oz/mo)                       | 19.2 ± 39.8  | 20.8 ± 44.9  | 18.9 ± 43.6  | 0.64        | 17.7 ± 37.4  | 14.3 ± 24.3  | 18.8 ± 41.5 | 0.18     |
| Physical activity index                      | 30.9 ± 4.7   | 30.7 ± 4.5   | 30.8 ± 4.7   | 0.60        | 31.1 ± 4.5   | 31.0 ± 4.4   | 31.1 ± 4.6  | 0.91     |
| Depression (%)                               | 9.1          | 10           | 12.4         | 0.18        | 11.8         | 10.5         | 10.1        | 0.82     |
| Stroke (%)                                   | 4.5          | 5.6          | 4.7          | 0.51        | 1.7          | 3.1          | 2.2         | 0.39     |
| Cancer (%)                                   | 12.8         | 12.8         | 15.3         | 0.31        | 9.2          | 15.9         | 14          | 0.026    |
| Diabetes (%)                                 | 41.2         | 40.4         | 41.0         | 0.94        | –            | –            | –           | –        |
| Hypertension (%)                             | 77.3         | 76           | 75.5         | 0.74        | –            | –            | –           | –        |
| CHD (%)                                      | 99.9         | 99.9         | 100          | 0.120       | –            | –            | –           | –        |

Values shown are mean ± SD for indirect measures and proportion (%) for direct measurements.

\*CMD: diabetes or hypertension or CHD.

\*\**p* from Fishers F-test.

**Supplementary Table 6. Hazard ratios (HR) by genotype of *MAP3K5* SNP *rs2076260* with total mortality in men with diabetes, CHD, hypertension, and any of these CMDs in two other genetic models besides the two models shown in Table 1 of the main article.**

| Disorder (n with, total)     | Cox model* | Genetic model** | With a CMD       |          | Without a CMD    |          |
|------------------------------|------------|-----------------|------------------|----------|------------------|----------|
|                              |            |                 | HR (95% CI)      | <i>p</i> | HR (95% CI)      | <i>p</i> |
| Diabetes<br>(990, 2478)      | 1          | CC/CT vs. TT    | 1.11 (0.96-1.29) | 0.17     | 1.06 (0.97-1.17) | 0.2091   |
|                              | 2          | CC/CT vs. TT    | 1.08 (0.92-1.27) | 0.34     | 1.05 (0.94-1.16) | 0.4160   |
| Hypertension<br>(1877, 1639) | 1          | CC/CT vs. TT    | 1.03 (0.93-1.15) | 0.56     | 1.12 (1.00-1.26) | 0.0515   |
|                              | 2          | CC/CT vs. TT    | 1.02 (0.90-1.15) | 0.79     | 1.08 (0.95-1.23) | 0.2517   |
| CHD<br>(724, 2792)           | 1          | CC/CT vs. TT    | 1.19 (1.00-1.42) | 0.050    | 1.06 (0.97-1.16) | 0.1866   |
|                              | 2          | CC/CT vs. TT    | 1.19 (0.98-1.45) | 0.071    | 1.02 (0.92-1.13) | 0.7077   |
| Any CMD<br>(2461, 1055)      | 1          | CC/CT vs. TT    | 1.06 (0.96-1.16) | 0.25     | 1.13 (0.97-1.31) | 0.11     |
|                              | 2          | CC/CT vs. TT    | 1.03 (0.92-1.14) | 0.63     | 1.10 (0.93-1.30) | 0.26     |
| Diabetes<br>(990, 2478)      | 1          | Additive        | 1.03 (0.95-1.12) | 0.48     | 1.02 (0.97-1.08) | 0.43     |
|                              | 2          | Additive        | 1.04 (0.95-1.14) | 0.35     | 1.02 (0.96-1.08) | 0.53     |
| Hypertension<br>(1877, 1639) | 1          | Additive        | 1.06 (0.99-1.12) | 0.087    | 0.98 (0.92-1.05) | 0.65     |
|                              | 2          | Additive        | 1.08 (1.00-1.15) | 0.036    | 0.98 (0.91-1.06) | 0.61     |
| CHD<br>(724, 2792)           | 1          | Additive        | 1.01 (0.92-1.11) | 0.82     | 1.02 (0.97-1.07) | 0.45     |
|                              | 2          | Additive        | 1.00 (0.90-1.11) | 0.98     | 1.04 (0.98-1.10) | 0.20     |
| Any CMD<br>(2461, 1055)      | 1          | Additive        | 1.05 (1.00-1.11) | 0.065    | 0.95 (0.88-1.04) | 0.28     |
|                              | 2          | Additive        | 1.08 (1.01-1.14) | 0.015    | 0.93 (0.84-1.02) | 0.14     |

\*Cox models: Model 1: Age-adjusted. Model 2: Covariate-adjusted, where covariates adjusted in Cox model were: age, BMI, glucose, smoking (pack-year), alcohol intake (oz/mo), physical activity index, depression, cancer, and stroke.

\*\*Genetic models: *Top half*: Minor allele homozygote model. *Bottom half*: Additive model, in which the genetic variables were coded as 0 for genotype CC, 1 for CT and 2 for TT, so that HR represents the additive effect of genotype on mortality.

**Supplementary Table 7. Variants in near perfect linkage disequilibrium (LD) with *rs2076260*, and additional information for each.**

| chr | pos (hg19) | LD (r <sup>2</sup> ) | LD (D') | Variant          | Ref/Alt | ASN freq | EUR freq | Promoter histone marks | Enhancer histone marks | DNase      | Motifs changed   |
|-----|------------|----------------------|---------|------------------|---------|----------|----------|------------------------|------------------------|------------|------------------|
| 6   | 136966619  | 0.81                 | 0.98    | <i>rs2237269</i> | G/C     | 0.37     | 0.16     |                        |                        | HRT, BLD   | 4 altered motifs |
| 6   | 136966741  | 0.93                 | 0.98    | <i>rs2237270</i> | T/C     | 0.37     | 0.17     |                        |                        | –          |                  |
| 6   | 136968541  | 0.94                 | 0.99    | <i>rs2237271</i> | A/C     | 0.45     | 0.17     | 6 tissues              | 17 tissues             | 20 tissues |                  |
| 6   | 136969853  | 0.97                 | 1.00    | <i>rs1997703</i> | C/T     | 0.45     | 0.18     |                        | 7 tissues              | –          |                  |
| 6   | 136974283  | 0.97                 | 0.99    | <i>rs6904753</i> | C/T     | 0.55     | 0.18     |                        | ADRL                   | –          | 4 altered motifs |
| 6   | 136977568  | 1.00                 | 1.00    | <i>rs2076260</i> | T/C     | 0.56     | 0.18     |                        | 6 tissues              | MUS, BRN   | 6 altered motifs |
| 6   | 136979240  | 0.84                 | 1.00    | <i>rs1011969</i> | C/A     | 0.55     | 0.16     |                        |                        | GI         | Mef2, TATA       |
| 6   | 136980134  | 0.83                 | 0.99    | <i>rs2272887</i> | A/G     | 0.48     | 0.16     |                        | ESDR, BRN, MUS         | 5 tissues  | Mtf1             |

All positions are based on genome release GRCh37 released Feb 2009 (UCSC equivalent = hg19).

*Abbreviations:* ADRL, adrenal; ESDR, embryonic stem cell derived; BLD, blood; BRN, brain; GI, gastrointestinal; HRT, heart; MUS, muscle.

**Supplementary Table 8. Summary of nucleotide sequences and putative functional features for *MAP3K5*.**

| Feature             | Location (hg19)         | Definition                                    |
|---------------------|-------------------------|-----------------------------------------------|
| <i>MAP3K5</i>       | 136,977,568–137,105,225 | Gene (transcribed right to left, i.e., 3'–5') |
| <i>MAP3K5-AS1</i>   | 136,950,252–136,969,336 | LncRNA (transcribed left to right, 5'–3')     |
| <i>rs2076260</i>    | 136,977,568             | Longevity-associated SNP, this study          |
| <i>rs6904753</i>    | 136,974,283             | Neighboring functional SNP                    |
| <i>LOC101928429</i> | 137,105,185–137,107,192 | LncRNA (transcribed left to right, 5'–3')     |
| cg21506299          | 137,105,225             | Site differentially methylated with BMI       |

\*hg19, the genome build describing where features are located. The actual sequences from NCBI/UCSC/Ensembl are identical to these, but their annotations will be different and updated at different frequencies.

**Supplementary Table 9. Putative functional variants and their effects on transcription of the common allele.**

| SNP              | Result (minor allele) | TF             | Biological pathways                                                                 | Tissue expression* |
|------------------|-----------------------|----------------|-------------------------------------------------------------------------------------|--------------------|
| <i>rs2237269</i> | abolish               | <i>GTF2I</i>   | Activation of immunoglobulin heavy-chain transcription upon B-lymphocyte activation | Most tissues       |
| <i>rs6904753</i> | create                | <i>HEY1</i>    | Repressive, induced by the Notch and c-Jun, repressive for GATA4 and GATA6          | Lung               |
|                  | create                | <i>ATF3</i>    | Unfolded protein response, stress response activating or repressive                 | Lung, thyroid      |
|                  | create                | <i>DMRT1/7</i> | Sex-determining pathway                                                             | < 100 FPKM         |
| <i>rs2076260</i> | abolish               | <i>HOXD10</i>  | Developmental regulatory system for anterior-posterior axis.                        | < 100 FPKM         |
|                  | abolish               | <i>POU2F2</i>  | Immunoglobulin gene promoter,                                                       | < 100 FPKM         |
|                  | abolish               | <i>TATA</i>    | RNA polymerase II initiation                                                        | < 100 FPKM         |
| <i>rs1011969</i> | create                | <i>MEF2</i>    | Activates many muscle-specific, growth factor-induced, and stress-induced genes     | Most tissues       |
|                  | create                | <i>TATA</i>    | Essential for progression of the G1 phase of the cell cycle                         | Most tissues       |
| <i>rs2272887</i> | create                | <i>MTF1</i>    | Induces expression of metallothioneins in response to exposure to heavy metals      | Most tissues       |

Data from HaploReg, v4.1. Biological pathway prediction is from GeneCards. Tissue expression patterns are from GTEx.

\* < 100 FPKM, fragments per kilobase of transcript per million mapped reads (indicates low level of expression).

**Supplementary Table 10. Super-enhancers overlapping *MAP3K5*, and their chromosomal location, size and tissue.**

| <b>ID</b> | <b>Chrom</b> | <b>Start</b> | <b>End</b> | <b>Size</b> | <b>Associated gene</b> | <b>Method</b> | <b>Rank</b> | <b>Cell/tissue</b>            |
|-----------|--------------|--------------|------------|-------------|------------------------|---------------|-------------|-------------------------------|
| SE_32506  | chr6         | 137070606    | 137115431  | 44825       | <i>MAP3K5</i>          | H3K27ac       | 52          | GM12878                       |
| SE_59682  | chr6         | 137063070    | 137114568  | 51498       | <i>MAP3K5</i>          | H3K27ac       | 79          | Ly4                           |
| SE_09572  | chr6         | 137071400    | 137114901  | 43501       | <i>MAP3K5</i>          | H3K27ac       | 436         | CD14                          |
| SE_11351  | chr6         | 137070304    | 137115433  | 45129       | <i>MAP3K5</i>          | H3K27ac       | 508         | CD20                          |
| SE_10763  | chr6         | 137071728    | 137113378  | 41650       | <i>MAP3K5</i>          | H3K27ac       | 608         | CD19 Primary                  |
| SE_19826  | chr6         | 137071508    | 137115095  | 43587       | <i>MAP3K5</i>          | H3K27ac       | 728         | CD4p CD25- Il17p PMAstim Th17 |

Data are from dbSUPER, (<https://asntech.org/dbsuper/index.php>) positions are according to GRCh37/hg19. ID refers to dbSUPER identification number. For descriptions of methods and rank see Hnisz et al. [14].
